# Supplementary material for: Femtosecond Laser-Processing of Pre-Anodized Ti-Based Bone Implants for Cell-Repellent Functionalization
Source: MDPI journal article supplement (doi:10.3390/nano11051342), 2021-05-20
Supplement: s1 [file s1]

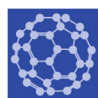

# Supplementary Materials of Femtosecond Laser-Processing of Pre-Anodized Ti-Based Bone Implants for Cell-Repellent Functionalization

Martina Muck <sup>1</sup>, Benedikt Wolfsjäger <sup>1</sup>, Karoline Seibert <sup>2</sup>, Christian Maier <sup>2</sup>, Shaukat Ali Lone <sup>3</sup>, Achim Walter Hassel <sup>3</sup>, Werner Baumgartner <sup>4</sup> and Johannes Heitz <sup>1,\*</sup>

<sup>1</sup> Institute of Applied Physics, Johannes Kepler University Linz, Altenberger Strasse 69, 4040 Linz, Austria; martina.muck@jku.at (M.M.); benedikt.wolfsjaeger@gmail.com (B.W.)

<sup>2</sup> Hofer GmbH & Co KG, Jahnstrasse 10-12, 8280 Fürstenfeld, Austria; karoline.seibert@hofer-medical.com (K.S.); christian.maier@hofer-medical.com (C.M.)

<sup>3</sup> Institute of Chemical Technology of Inorganic Materials, Johannes Kepler University Linz, Altenberger Strasse 69, 4040 Linz, Austria; shaukat\_ali.lone@jku.at (S.A.L.); achimwalter.hassel@jku.at (A.W.H.)

<sup>4</sup> Institute of Biomedical Mechatronics, Johannes Kepler University Linz, Altenberger Strasse 69, 4040 Linz, Austria; werner.baumgartner@jku.at

\* Correspondence: johannes.heitz@jku.at; Tel.: +43-732-2468-9404

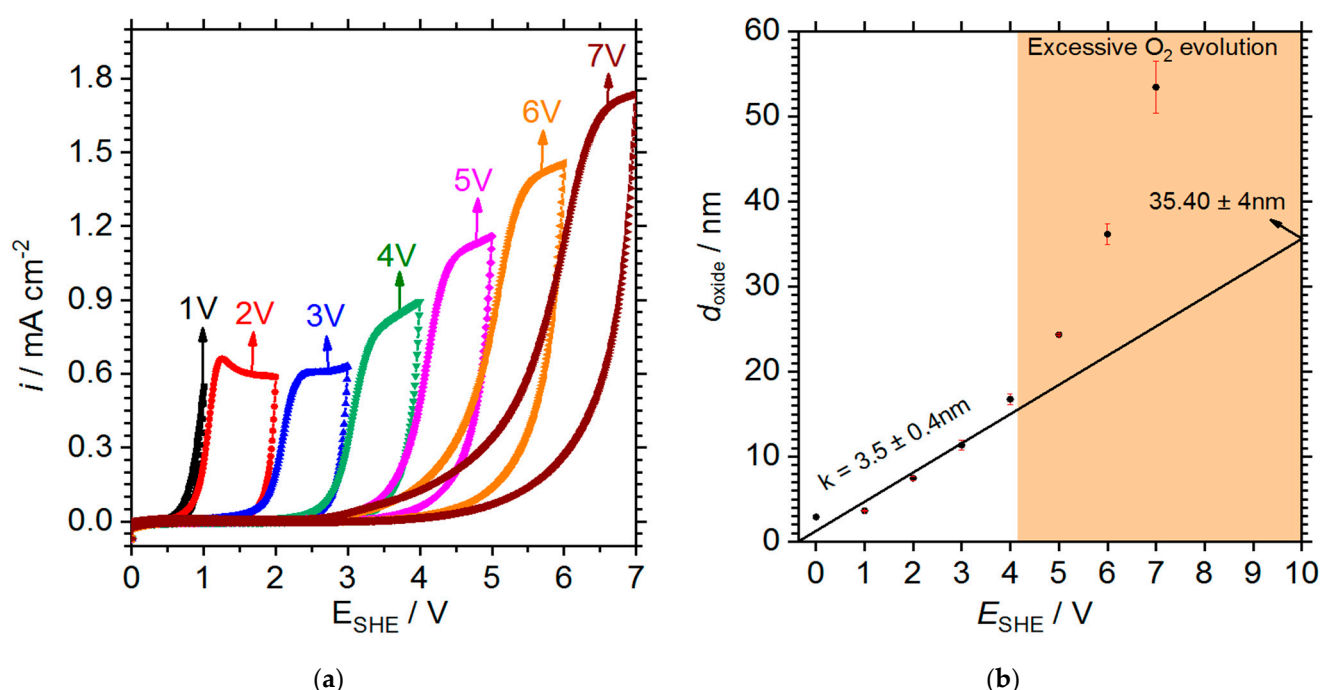

**Figure S1.** Cyclic Voltammograms obtained by 1 V step increment in the voltage up to a maximum of (a) 7 V for mirror polished Ti-6Al-4V alloy surface. (b) Thickness estimation of anodized oxide layer formed on polished Ti-6Al-4V alloy surface after each increment in the voltage. The oxidation of the surface starts at a voltage  $E_{\text{SHE}}$  of about 1.2 V, which is accompanied by excessive  $\text{O}_2$  evolution for voltages of about  $E_{\text{SHE}} = 4.3$  V and higher. This figure adapted from [1] (see below).

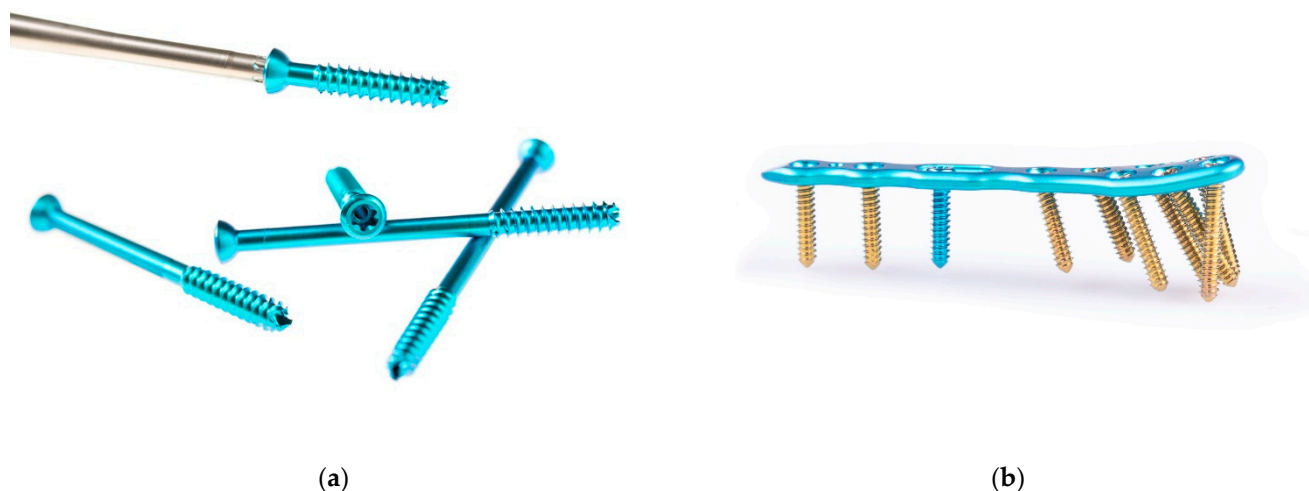

**Figure S2.** Pre-anodized Bone Implants: Commercially available Ti-based bone screws and bone plates from the product line of Hofer GmbH & Co KG (Fürstenfeld, Austria, <https://www.hofer-medical.com/>). (a) Screws that show an intensive blue color due to pre-anodization, as most of the screws used in our experiments; (b) Blue and gold colored screws, screwed into a bone plate, that were pre-anodized under two different conditions.

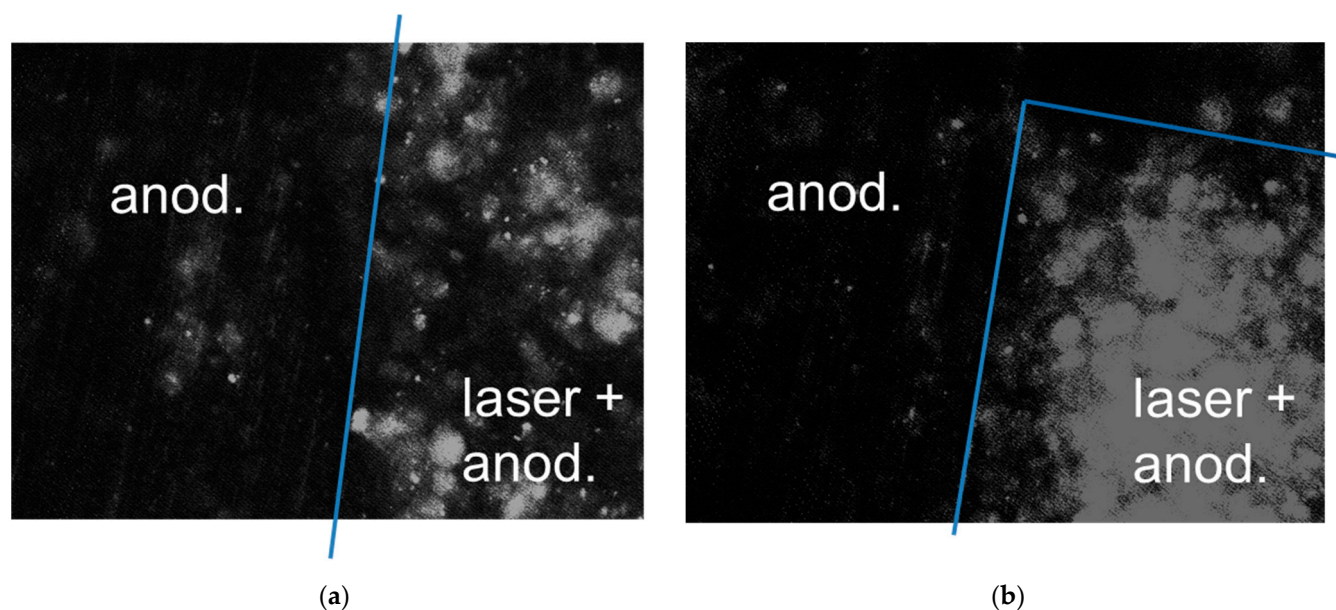

**Figure S3.** Collagen Type I Immunostaining: Fluorescence microscope images of osteoblasts on laser-structured and/or anodized Ti-6Al-4V alloy samples stained against collagen Type I. Bright color corresponds to high fluorescence. The blue lines are the border between areas which were femtosecond laser-processed and sub-sequently anodized (laser + anod.) and areas which were anodized (anod.), respectively. Figures (a) and (b) show the results from two different samples.

## References

1. Lone, S.A.; Muck, M.; Fosodeder, P.; Mardare, C.C.; Florian, C.; Weth, A.; Krüger, J.; Steinwender, C.; Baumgartner, W.; Bonse, J.; Heitz, J.; Hassel, A.W.; *Phys. Stat. Solidi A* **2020**, *217*, 1900838. doi:10.1002/pssa.201900838
